# Supplementary material for: 3D assimilation and radiative impact assessment of aerosol black carbon over the Indian region using aircraft, balloon, ground-based, and multi-satellite observations
Source: Copernicus journal article supplement (doi:10.5194/acp-23-12801-2023), 2023-10-12
Supplement: Supplementary file 1 [file acp-23-12801-2023-supplement.pdf]

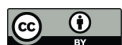

*Supplement of*

## **3D assimilation and radiative impact assessment of aerosol black carbon over the Indian region using aircraft, balloon, ground-based, and multi-satellite observations**

**Nair Krishnan Kala et al.**

*Correspondence to:* Nair Krishnan Kala (kalanair56@gmail.com)

The copyright of individual parts of the supplement might differ from the article licence.

### Supplementary Information

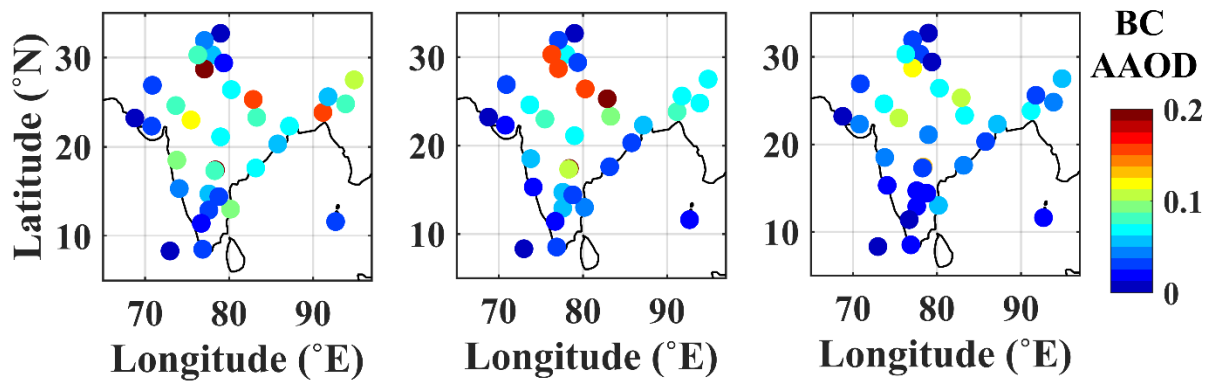

**Figure S1.** Variation of BC AAOD at the ARFINET measurement sites for (a) DJF, (b) MAM, and (c) ON seasons.

5

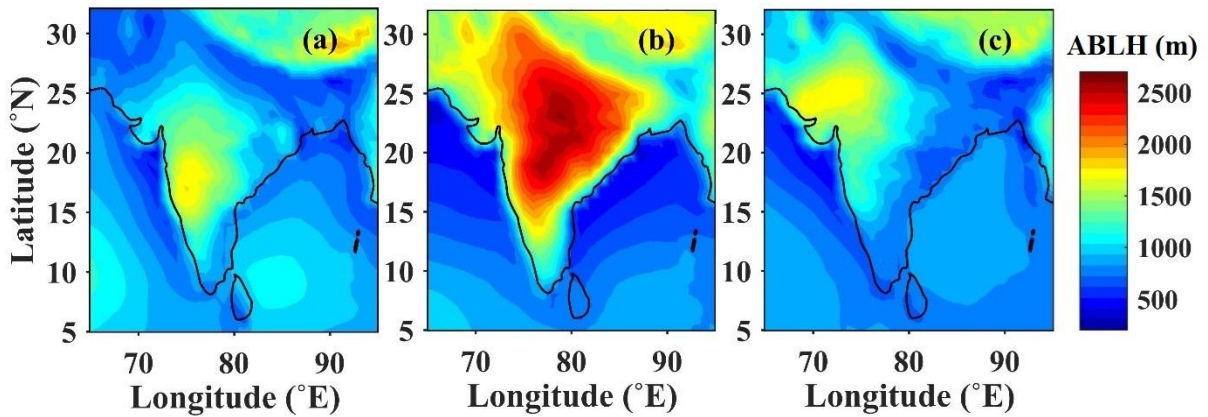

**Figure S2.** Seasonal mean atmospheric boundary layer height (ABLH) from MERRA-2 reanalysis for (a) DJF, (b) MAM, and (c) ON seasons.

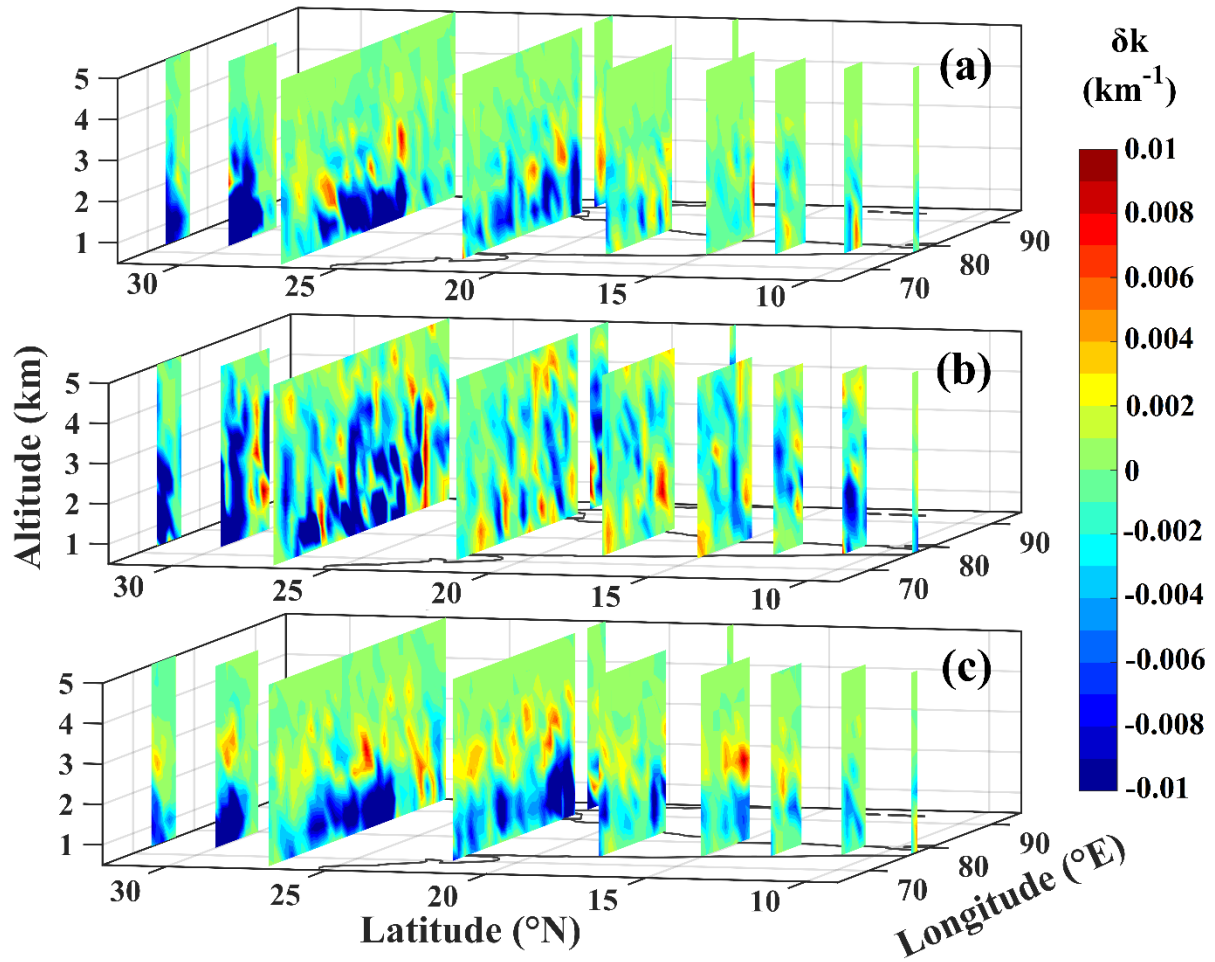

10

**Figure S3.** Variation in  $\delta k$  during (a) DJF, (b) MAM, and (c) ON seasons.

### Examination of Background covariance structure of 3D-Var assimilation technique

The background error covariance in 3D-Var assimilation technique is derived either from climatological data or forecasts (Lewis et al., 2006). We have estimated the covariance matrix from climatological data (Eq. 3) as it effectively captures the spatial covariance structure (Pathak et al., 2019). Due to the relatively short data availability duration, it can be safely assumed that there are no discernible increasing or decreasing trends in the absorbing aerosol loading during the assimilation period. Thus, the deviations in monthly mean BC absorption coefficient across different years is considered as anomalies which are further employed for covariance estimation. The square root of diagonal elements of covariance matrix provides the estimates for the uncertainties in the background data at respective locations, while off-diagonal elements signify the cross-covariance values, which provide valuable insights on how the aerosol emissions from a grid influence the neighboring grids, and vice versa. It should be noted here that the present methodology does not employ any external estimates of the uncertainties in the background data.

Careful examination of the spatial covariance (off-diagonal components) within the error covariance matrix is performed. Two representative locations are selected, one each from North India and the other from Peninsular India, at an altitude of 2 km amsl, for MAM season. The results, representatives of which are shown in Figure S4, indicate that the covariance matrix adequately captures the spatial covariance for nearby locations as shown in

25

Figure. S4. In the top panel of Figure. S4, around the source region from peninsular India (marked by black diamond symbols), the covariance is high at an altitude of 2 km, indicating that the nearby grids are getting strongly influenced by the source region. Similarly, in the bottom panel of Figure S4, where a source from north India is considered, high covariance is observed over the Indo-Gangetic Plain at an altitude of 2 km. A similar pattern of high covariance is observed for other source locations as well.

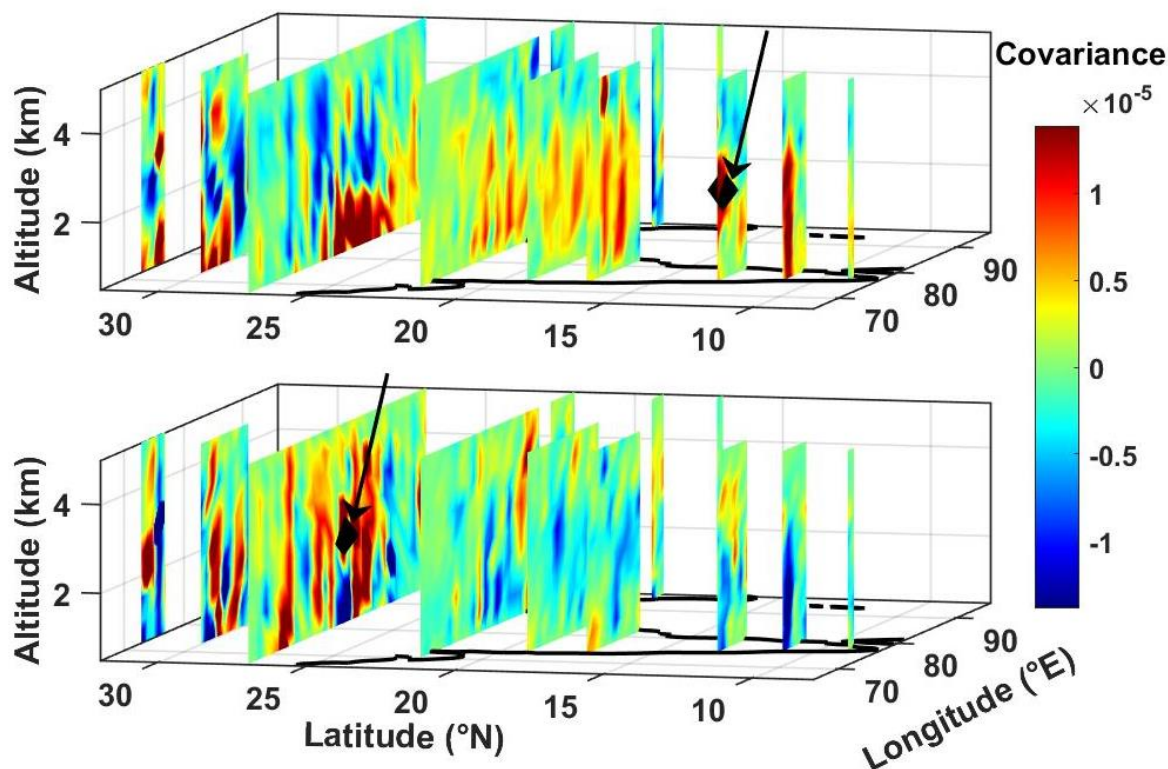

Figure S4. Spatial variation of the covariance between a single grid (marked with black diamond and arrow) and rest of the grids for peninsular (top panel) and northern (bottom panel) India.

- Lewis, J. M., Lakshmiarahan, S., and Dhall, S.: Dynamic data assimilation: a least squares approach, Vol. 104, Encyclopedia of Mathematics and its Applications, Cambridge University Press, Cambridge, 2006.
- Pathak, H. S., Satheesh, S. K., Nanjundiah, R. S., Moorthy, K. K., Lakshmiarahan, S., and Babu, S. S.: Assessment of regional aerosol radiative effects under the SWAAMI campaign–Part 1: Quality-enhanced estimation of columnar aerosol extinction and absorption over the Indian subcontinent, Atmospheric Chemistry and Physics, 19, 11865-11886, <https://doi.org/10.5194/acp-19-11865-2019>, 2019.

Table S1. Details of the surface measurement stations under ARFINET.

| Sl. No. | Station name | Station code | Latitude (°N) | Longitude (°E) | Altitude (m amsl) |
|---------|--------------|--------------|---------------|----------------|-------------------|
| 1       | Agartala     | AGR          | 91.2          | 23.8           | 13                |
| 2       | Ahmedabad    | AMD          | 23            | 75.5           | 53                |
| 3       | Anantapur    | ATP          | 14.7          | 77.6           | 335               |
| 4       | Bhubaneswar  | BBR          | 20.3          | 85.8           | 58                |
| 5       | Bengaluru    | BLR          | 12.9          | 85.8           | 920               |

|    |                      |     |      |      |      |
|----|----------------------|-----|------|------|------|
| 6  | Chennai              | CHN | 13   | 80.2 | 6    |
| 7  | Dibrugarh            | DBR | 27.5 | 94.9 | 108  |
| 8  | Dehradun             | DDN | 30.3 | 78   | 640  |
| 9  | Delhi                | DEL | 28.7 | 77.1 | 300  |
| 10 | Goa                  | GOA | 15.3 | 74.1 | 8    |
| 11 | Hyderabad (urban)    | HDN | 17.4 | 78.4 | 542  |
| 12 | Hyderabad (suburban) | HDT | 17.3 | 78.3 | 542  |
| 13 | Hanle                | HNL | 32.7 | 79   | 4500 |
| 14 | Imphal               | IPH | 24.8 | 93.9 | 786  |
| 15 | Jaisalmer            | JSL | 26.9 | 70.9 | 225  |
| 16 | Kadappa              | KDP | 14.4 | 78.8 | 138  |
| 17 | Kharagpur            | KGP | 22.3 | 87.2 | 61   |
| 18 | Kanpur               | KNP | 26.4 | 80.3 | 126  |
| 19 | Kullu                | KLU | 31.9 | 77.1 | 1279 |
| 20 | Naliya               | NAL | 23.2 | 68.6 | 26   |
| 21 | Nagpur               | NGP | 21.1 | 79   | 310  |
| 22 | Nainital             | NTL | 29.4 | 79.4 | 2084 |
| 23 | Ooty                 | OTY | 11.4 | 76.7 | 2240 |
| 24 | Patiala              | PTL | 30.3 | 76.3 | 257  |
| 25 | Pune                 | PUN | 18.5 | 73.8 | 560  |
| 26 | Rajkot               | RKT | 22.3 | 70.8 | 134  |
| 27 | Ranchi               | RNC | 23.3 | 83.3 | 651  |
| 28 | Shillong             | SHN | 25.6 | 91.8 | 1525 |
| 29 | Thiruvananthapuram   | TVM | 8.5  | 76.9 | 10   |
| 30 | Udaipur              | UDP | 24.6 | 73.7 | 423  |
| 31 | Varanasi             | VNS | 25.3 | 82.9 | 81   |
| 32 | Vishakhapatnam       | VSK | 17.6 | 83.2 | 45   |
